# Supplementary material for: Regulating the metal-insulator transition of REBaCo2O5+δ combining RE-substitution and anion control
Source: Royal Society of Chemistry journal article supplement (doi:10.1039/d6ra00137h), 2026-03-27
Supplement: d6ra00137h1.pdf [file d6ra00137h1.pdf]

**Regulating the metal-insulator transition of  $REBaCo_2O_{5+\delta}$  combining *RE*-  
substitution and anion control**

Fang Zhang<sup>1†</sup>, Yuchen Cui<sup>2†</sup>, Jingxin Gao<sup>2</sup>, Hao Zhang<sup>2</sup>, Yi Bian<sup>2</sup>, Chen Liu<sup>3</sup>, Nuofu  
Chen<sup>1\*</sup>, and Jikun Chen<sup>2\*</sup>

<sup>1</sup>School of Renewable Energy, North China Electric Power University, Beijing  
102206, China

<sup>2</sup>School of Materials Science and Engineering, University of Science and Technology  
Beijing, Beijing 100083, China

<sup>3</sup>Beijing Synchrotron Radiation Facility, Institute of High Energy Physics, Chinese  
Academy of Sciences, Beijing 100049, China

<sup>†</sup>F. Zhang and Y. Cui contribute equally

\*Correspondence: Nuofu Chen ([nfchen@ncepu.edu.cn](mailto:nfchen@ncepu.edu.cn)) and Jikun Chen  
([jikunchen@ustb.edu.cn](mailto:jikunchen@ustb.edu.cn))

**Table S1** Details for the sample synthesis and refinement of as-synthesized  $REBaCo_2O_{5+\delta}$  in air, refined using the  $Pmmm$  space group

| <i>RE</i> | <i>Space group</i> | $2a, \text{\AA}$ | $b, \text{\AA}$ | $c, \text{\AA}$ | $V, (\text{\AA})^3$ | $R_p$ | $R_{wp}$ | $R_{exp}$ | $\chi^2$ |
|-----------|--------------------|------------------|-----------------|-----------------|---------------------|-------|----------|-----------|----------|
| Pr        | <i>Pmmm</i>        | 7.807            | 7.817           | 7.630           | 232.849             | 4.86  | 6.29     | 4.65      | 1.83     |
| Nd        | <i>Pmmm</i>        | 7.796            | 7.809           | 7.612           | 231.736             | 6.33  | 8.34     | 4.21      | 3.91     |
| Sm        | <i>Pmmm</i>        | 7.778            | 7.846           | 7.551           | 230.457             | 6.49  | 8.58     | 4.38      | 3.84     |
| Eu        | <i>Pmmm</i>        | 7.783            | 7.824           | 7.535           | 229.464             | 6.95  | 9.29     | 6.61      | 1.97     |
| Gd        | <i>Pmmm</i>        | 7.776            | 7.818           | 7.524           | 228.735             | 6.46  | 9.04     | 6.12      | 2.18     |
| Tb        | <i>Pmmm</i>        | 7.737            | 7.816           | 7.514           | 227.264             | 5.46  | 7.02     | 5.66      | 1.54     |
| Dy        | <i>Pmmm</i>        | 7.762            | 7.782           | 7.499           | 226.516             | 4.85  | 6.89     | 3.86      | 3.19     |
| Ho        | <i>Pmmm</i>        | 7.747            | 7.752           | 7.496           | 225.091             | 5.33  | 7.07     | 4.28      | 2.73     |

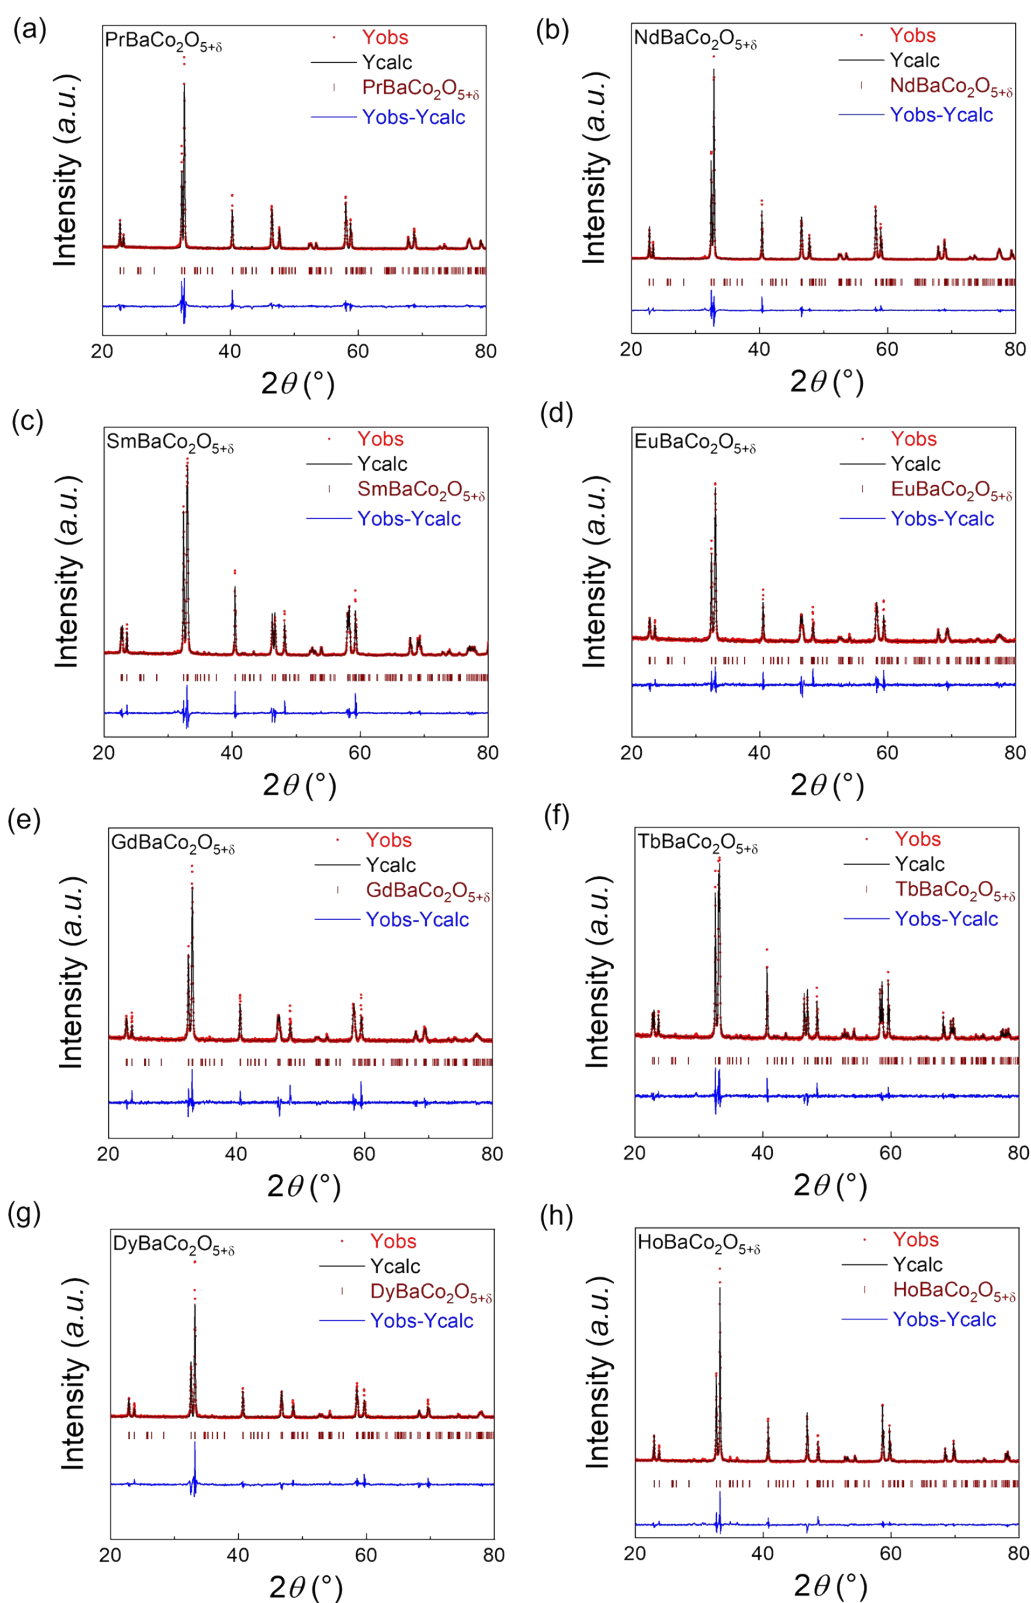

**Fig. S1** The X-ray diffraction (XRD) patterns and refinements for as-synthesized  $REBaCo_2O_{5+\delta}$ . (a)-(h) corresponds to samples No.1-No.8 listed in Table S1, respectively.

**Table S2** Details for the sample synthesis and refinement of as-synthesized  $REBaCo_2O_{5+\delta}$  in air, refined using the  $P4/mmm$  space group

| $RE$ | Space group | $2a, \text{\AA}$ | $b, \text{\AA}$ | $c, \text{\AA}$ | $V, (\text{\AA})^3$ | $R_p$ | $R_{wp}$ | $R_{exp}$ | $\chi^2$ |
|------|-------------|------------------|-----------------|-----------------|---------------------|-------|----------|-----------|----------|
| Pr   | $P4/mmm$    | 7.812            | —               | 7.630           | 116.418             | 6.67  | 9.43     | 4.65      | 4.11     |
| Nd   | $P4/mmm$    | 7.803            | —               | 7.612           | 115.883             | 6.16  | 8.49     | 4.21      | 4.08     |
| Dy   | $P4/mmm$    | 7.771            | —               | 7.501           | 113.252             | 5.88  | 8.54     | 4.13      | 4.28     |
| Ho   | $P4/mmm$    | 7.753            | —               | 7.499           | 112.694             | 4.58  | 5.91     | 4.27      | 1.91     |

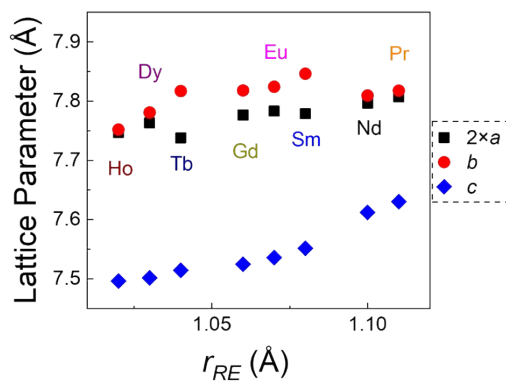

**Fig. S2** The lattice parameters for as-synthesized  $REBaCo_2O_{5+\delta}$  in air plotted as a function of the ionic radius of rare-earth, refined using the  $Pm\bar{m}m$  space group

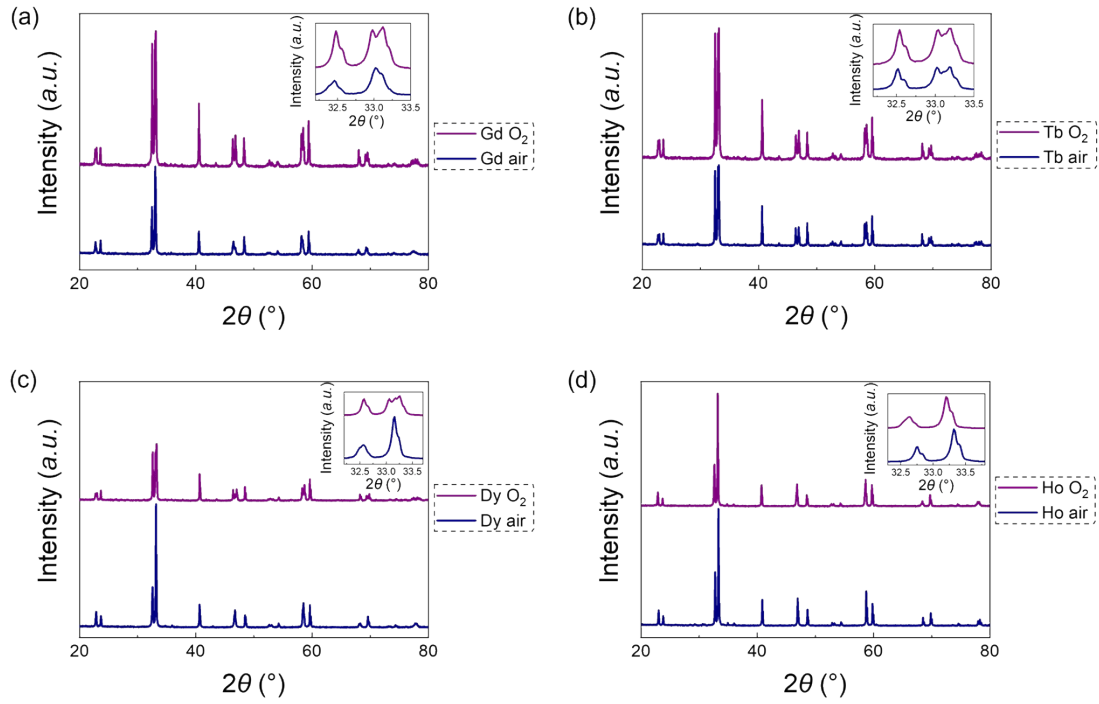

**Fig. S3** The X-ray diffraction (XRD) patterns for  $REBaCo_2O_{5+\delta}$  synthesized in air and annealed in Mpa-high oxygen. (a)-(d) corresponds to  $GdBaCo_2O_{5+\delta}$ ,  $TbBaCo_2O_{5+\delta}$ ,  $DyBaCo_2O_{5+\delta}$  and  $HoBaCo_2O_{5+\delta}$ , respectively.

**Table S3** Details for the sample synthesis and refinement of  $REBaCo_2O_{5+\delta}$  annealed in 5 Mpa oxygen for 24 hours at 300 °C

| <i>RE</i> | <i>Space group</i> | <i>2a</i> , Å | <i>b</i> , Å | <i>c</i> , Å | <i>V</i> , (Å) <sup>3</sup> | <i>R<sub>p</sub></i> | <i>R<sub>wp</sub></i> | <i>R<sub>exp</sub></i> | $\chi^2$ |
|-----------|--------------------|---------------|--------------|--------------|-----------------------------|----------------------|-----------------------|------------------------|----------|
| Gd        | <i>Pmmm</i>        | 7.750         | 7.823        | 7.531        | 228.340                     | 5.14                 | 7.34                  | 4.05                   | 3.29     |
| Tb        | <i>Pmmm</i>        | 7.734         | 7.813        | 7.518        | 227.191                     | 5.45                 | 7.87                  | 3.90                   | 4.07     |
| Dy        | <i>Pmmm</i>        | 7.722         | 7.810        | 7.506        | 226.371                     | 5.30                 | 7.85                  | 3.97                   | 3.92     |

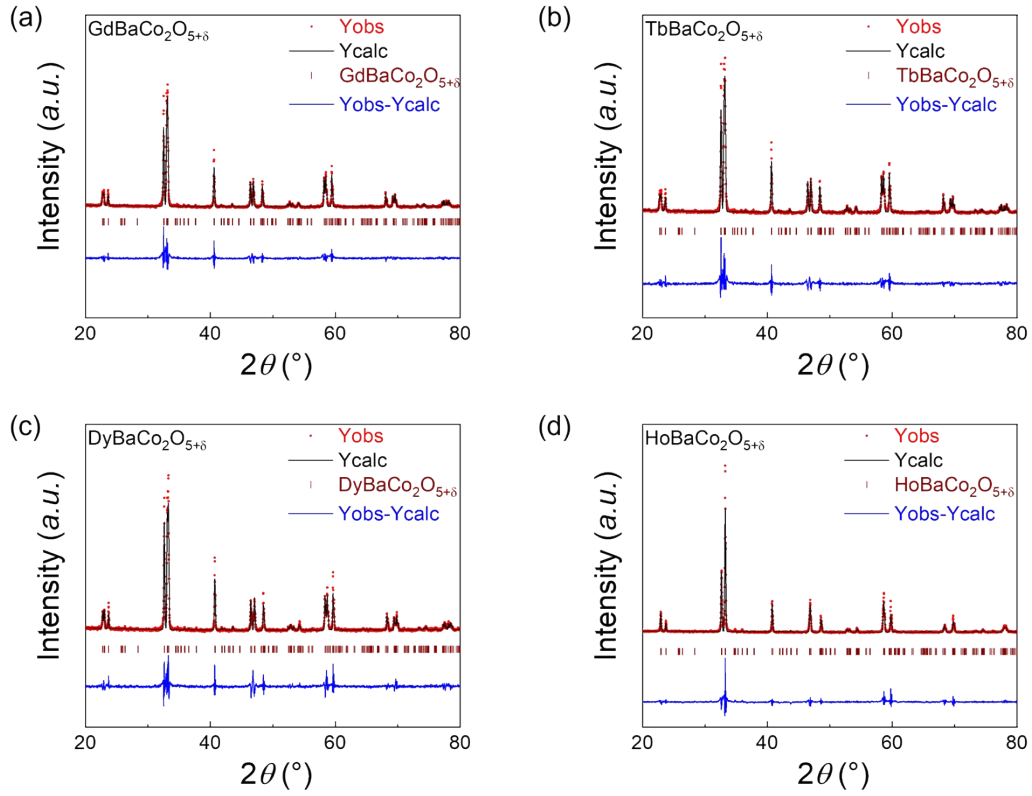

**Fig. S4** The X-ray diffraction (XRD) patterns and refinements for  $\text{REBaCo}_2\text{O}_{5+\delta}$  annealed in Mpa-high oxygen. (a)-(d) corresponds to samples No.1-No.4 listed in Table S3, respectively.

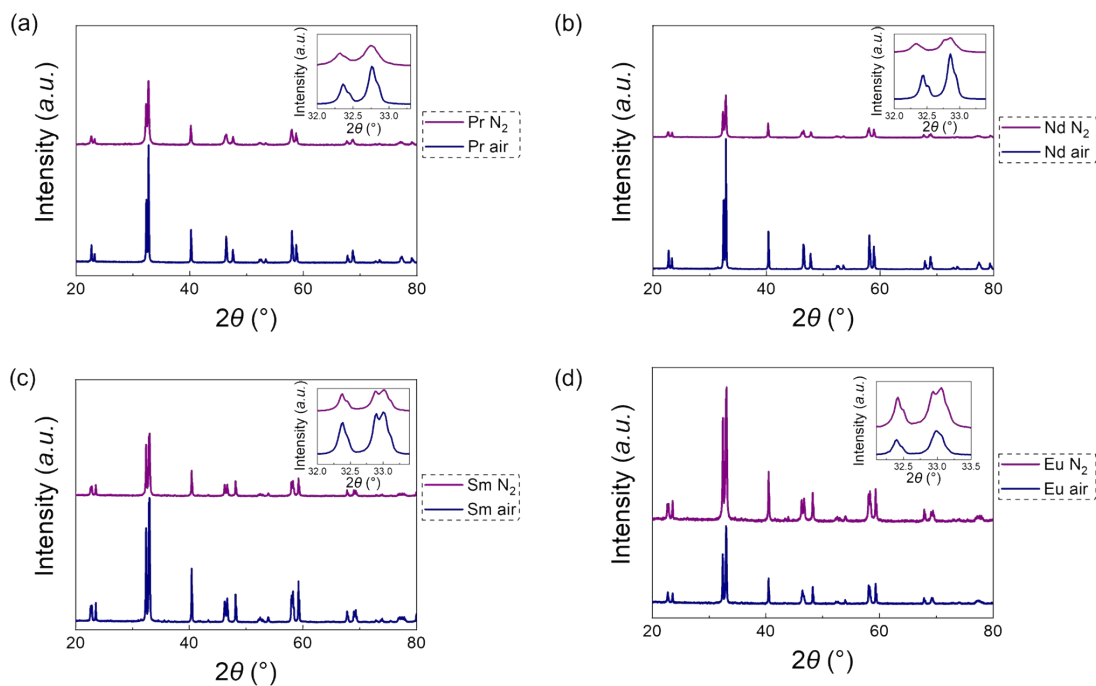

**Fig. S5** The X-ray diffraction (XRD) patterns for  $REBaCo_2O_{5+\delta}$  synthesized in air and annealed in  $N_2$  flow. (a)-(d) corresponds to  $PrBaCo_2O_{5+\delta}$ ,  $NdBaCo_2O_{5+\delta}$ ,  $SmBaCo_2O_{5+\delta}$  and  $EuBaCo_2O_{5+\delta}$ , respectively.

**Table S4** Details for the sample synthesis and refinement of  $REBaCo_2O_{5+\delta}$  annealed in nitrogen for 12 hours at 300 °C

| <i>RE</i> | <i>Space group</i> | $2a$ , Å | $b$ , Å | $c$ , Å | $V$ , (Å) <sup>3</sup> | $R_p$ | $R_{wp}$ | $R_{exp}$ | $\chi^2$ |
|-----------|--------------------|----------|---------|---------|------------------------|-------|----------|-----------|----------|
| Pr        | <i>Pmmm</i>        | 7.804    | 7.851   | 7.630   | 233.818                | 6.84  | 9.59     | 4.51      | 4.52     |
| Nd        | <i>Pmmm</i>        | 7.794    | 7.851   | 7.600   | 232.585                | 6.45  | 8.93     | 4.30      | 4.31     |
| Sm        | <i>Pmmm</i>        | 7.775    | 7.847   | 7.552   | 230.391                | 6.60  | 9.41     | 4.43      | 4.51     |
| Eu        | <i>Pmmm</i>        | 7.764    | 7.835   | 7.538   | 229.342                | 5.95  | 8.43     | 4.20      | 4.03     |

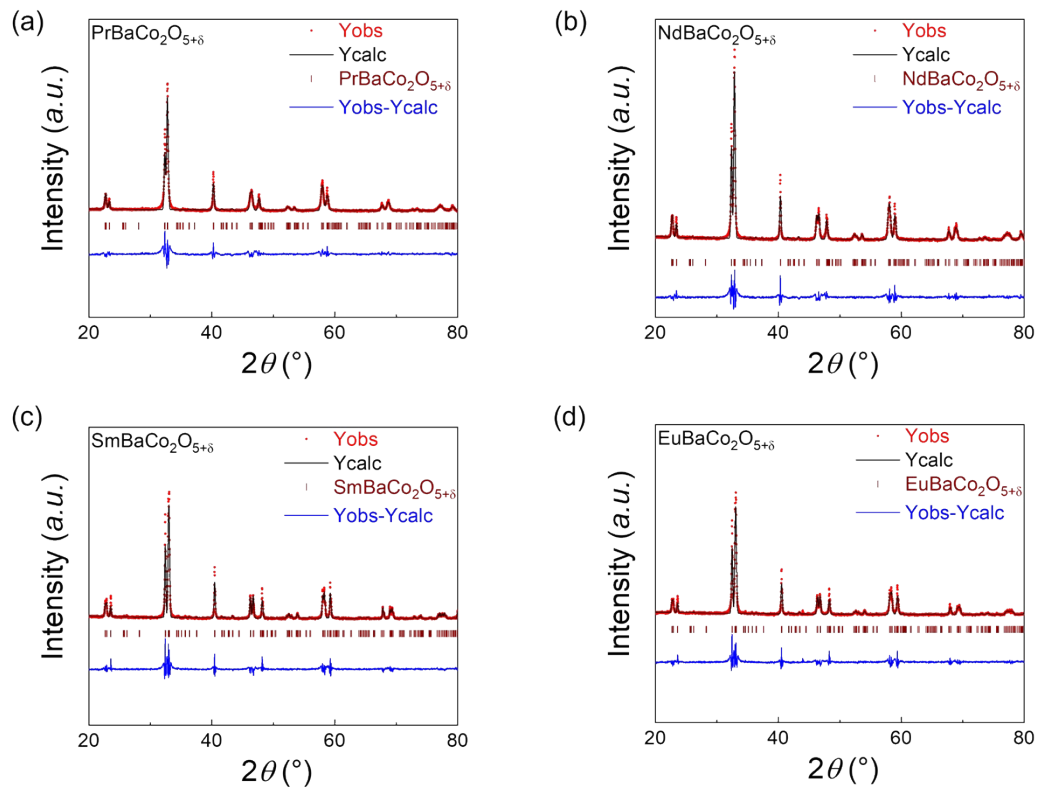

**Fig. S6** The X-ray diffraction (XRD) patterns and refinements for  $REBaCo_2O_{5+\delta}$  annealed in  $N_2$  flow. (a)-(d) corresponds to samples No.1-No.4 listed in Table S4,

respectively.

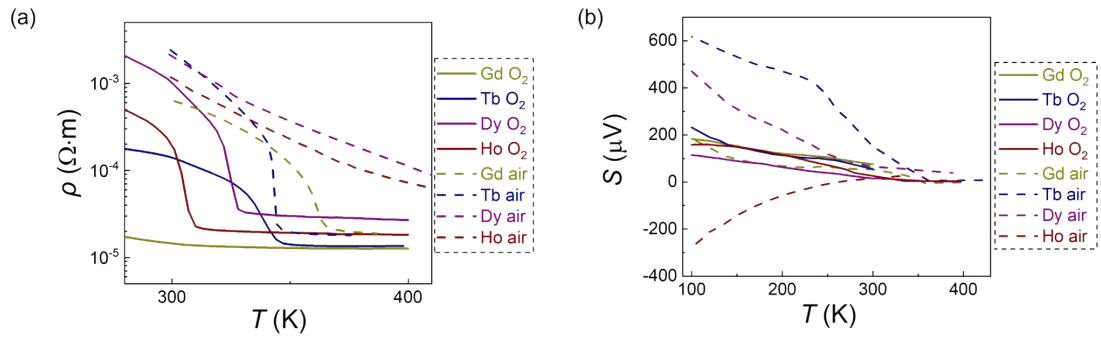

**Fig. S7** (a) The relationship between resistivity and temperature for high-pressure oxygen-annealed and air-synthesized  $REBaCo_2O_{5+\delta}$ . (b) The relationship between seebeck coefficient and temperature for high-pressure oxygen-annealed and air-synthesized  $REBaCo_2O_{5+\delta}$ .

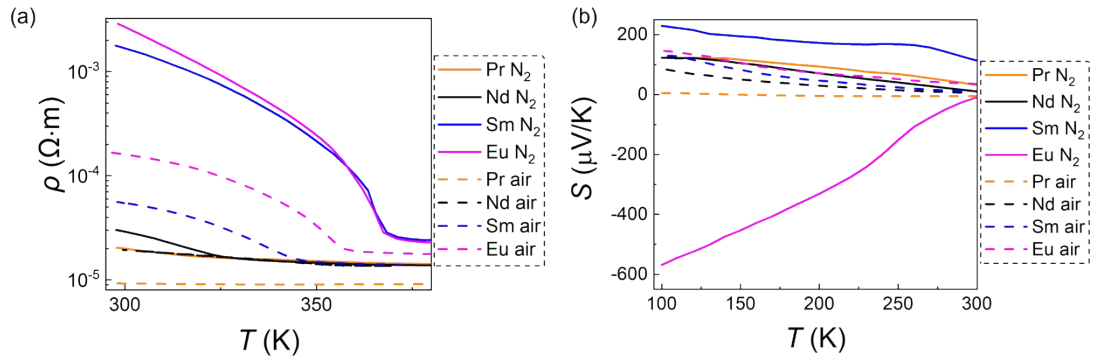

**Fig. S8** (a) The relationship between resistivity and temperature for nitrogen - annealed and air-synthesized  $REBaCo_2O_{5+\delta}$ . (b) The relationship between seebeck coefficient and temperature for nitrogen-annealed and air-synthesized  $REBaCo_2O_{5+\delta}$ .

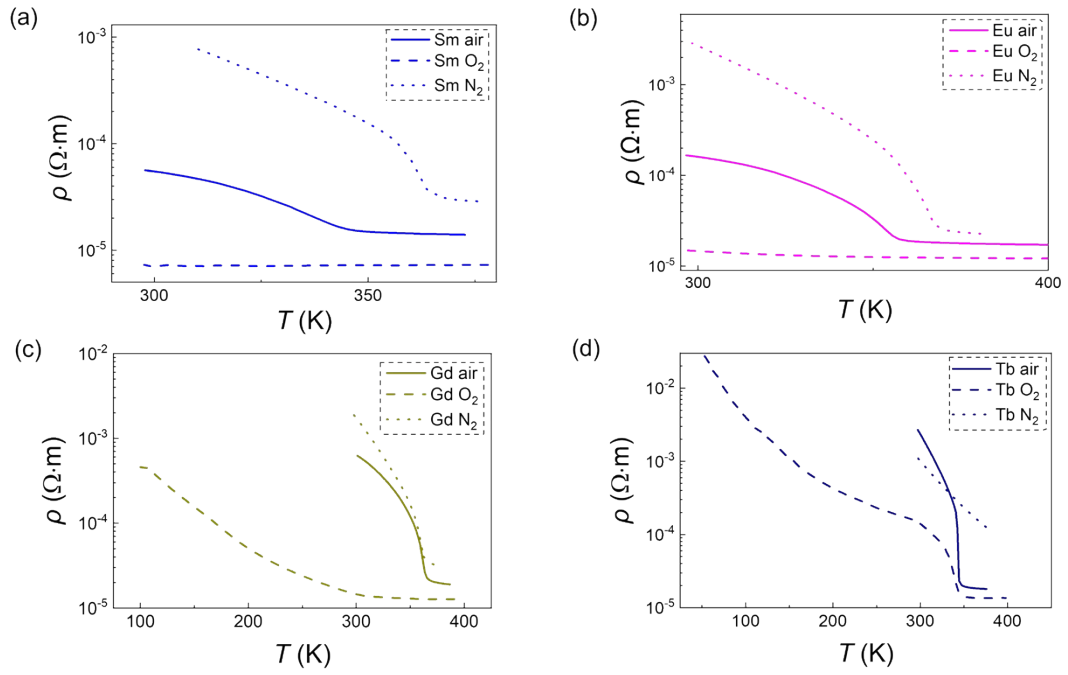

**Fig. S9** Resistivity as a function of temperature for high-pressure oxygen-annealed, nitrogen-annealed and air-synthesized  $REBaCo_2O_{5+\delta}$ . (a)-(d) corresponds to  $SmBaCo_2O_{5+\delta}$ ,  $EuBaCo_2O_{5+\delta}$ ,  $GdBaCo_2O_{5+\delta}$  and  $TbBaCo_2O_{5+\delta}$ , respectively.

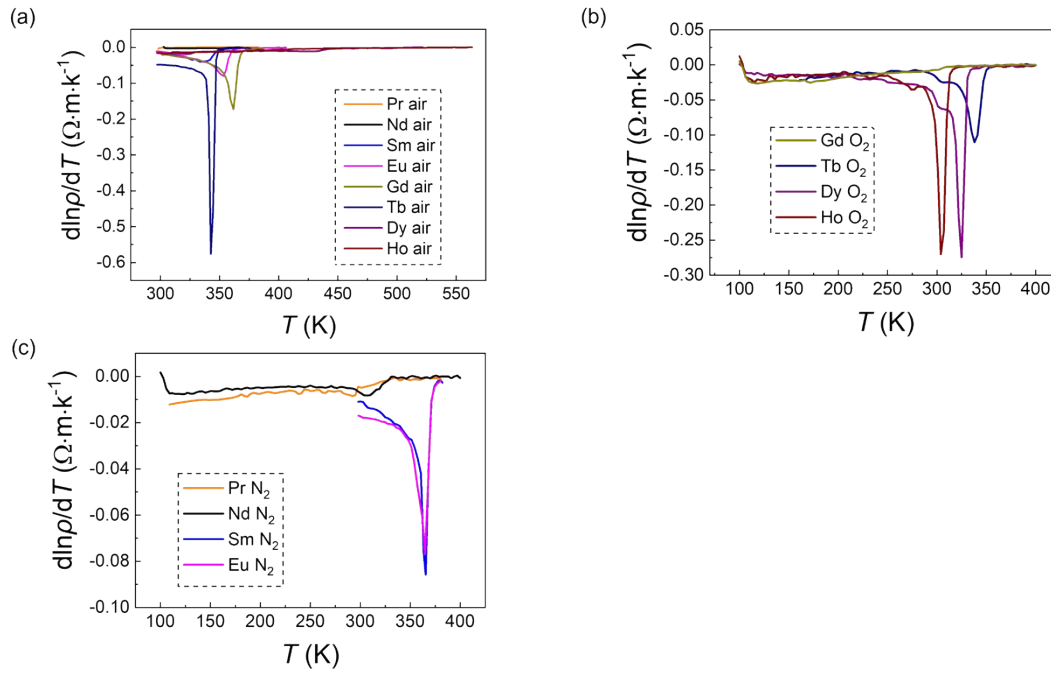

**Fig. S10** (a)  $d(\ln\rho)/d(T)$ - $T$  tendency for  $REBaCo_2O_{5+\delta}$  ( $RE=$  Pr, Nd, Sm, Eu, Gd, Tb, Dy, Ho) polycrystalline ceramic samples synthesized in the air, and the temperature of the peak is defined as  $T_{MIT}$ . (b)  $d(\ln\rho)/d(T)$ - $T$  tendency for  $REBaCo_2O_{5+\delta}$  ( $RE=$  Gd, Tb, Dy and Ho) polycrystalline ceramic samples annealed in Mpa-high oxygen, and the temperature of the peak is defined as  $T_{MIT}$ . (c)  $d(\ln\rho)/d(T)$ - $T$  tendency for  $REBaCo_2O_{5+\delta}$  ( $RE=$  Pr, Nd, Sm and Eu) polycrystalline ceramic samples annealed in N<sub>2</sub> flow, and the temperature of the peak is defined as  $T_{MIT}$ .

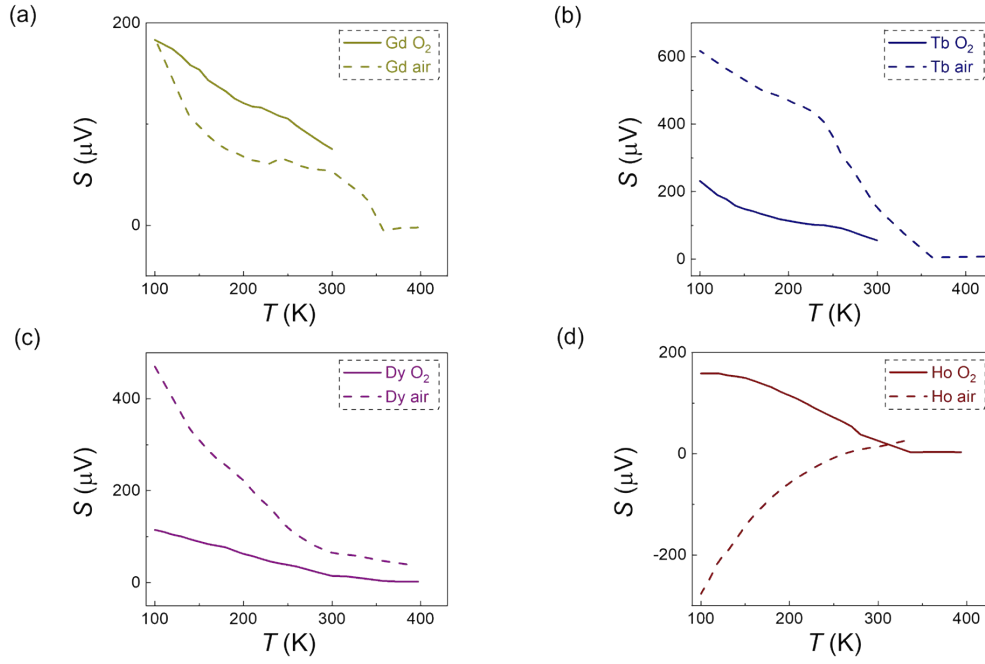

**Fig. S11** Comparison of the Seebeck coefficient as a function of temperature for  $REBaCo_2O_{5+\delta}$  synthesized in air and post-annealed in high pressure oxygen. (a),  $GdBaCo_2O_{5+\delta}$ . (b),  $TbBaCo_2O_{5+\delta}$ . (c),  $DyBaCo_2O_{5+\delta}$ . (d),  $HoBaCo_2O_{5+\delta}$ . The post-annealing process alters the  $\delta$  away from 0.5, as evidenced by a reduction in the absolute value of the Seebeck coefficient for all samples, consistent with the previous reports<sup>1</sup>. It is worth noticing that the  $HoBaCo_2O_{5+\delta}$  exhibits the most significant change (e.g., the Seebeck coefficient switching from negative to positive), indicating a change in the dominant carrier type.

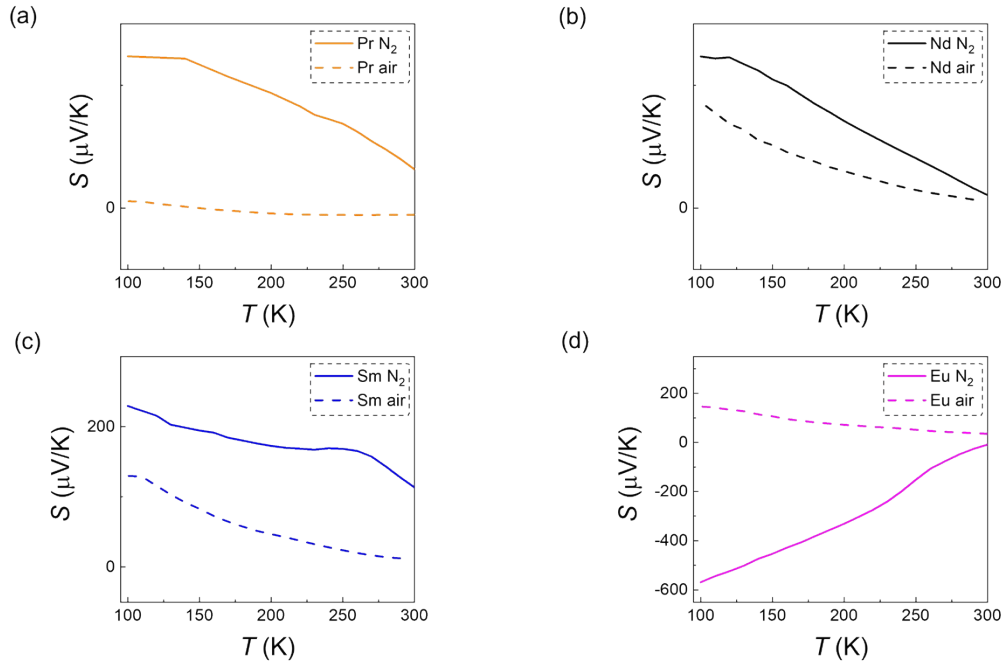

**Fig. S12** Comparison of the Seebeck coefficient as a function of temperature for  $REBaCo_2O_{5+\delta}$  synthesized in air and post-annealed in nitrogen. (a),  $PrBaCo_2O_{5+\delta}$ . (b),  $NdBaCo_2O_{5+\delta}$ . (c),  $SmBaCo_2O_{5+\delta}$ . (d),  $EuBaCo_2O_{5+\delta}$ . In contrast to the oxygen-annealed samples as shown in Fig. S11, the absolute Seebeck coefficient increases for all samples after nitrogen annealing, indicating that  $\delta$  shifts closer to 0.5 after nitrogen treatment. It is worth noticing that the  $EuBaCo_2O_{5+\delta}$  exhibits the most significant change (e.g., the Seebeck coefficient switching from negative to positive), demonstrating a reversal of the dominant carrier type.

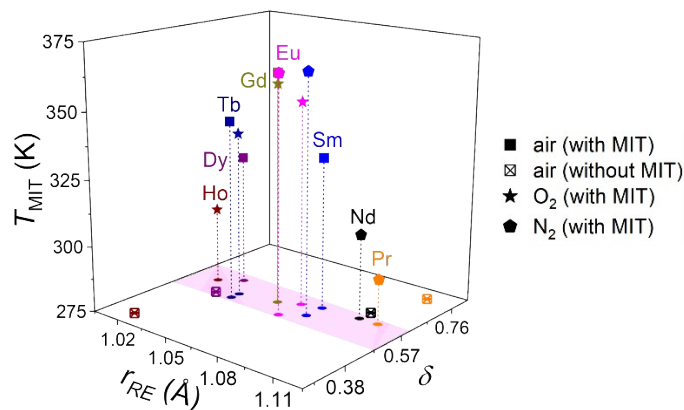

**Fig. S13** The metal-insulator transition temperature ( $T_{MIT}$ ) plotted as a function of

rare-earth ionic radius( $r_{RE}$ ) and oxygen content.

It can be observed that metal-insulator transition temperature ( $T_{MIT}$ ) of  $ReBaCo_2O_{5+\delta}$  exhibits a non-monotonic dependence on the rare-earth ionic radius ( $r_{RE}$ ), indicating the regulation of rare-earth composition on  $T_{MIT}$ . It is also worth noticing that the metal-insulator transition (MIT) behavior of  $ReBaCo_2O_{5+\delta}$  is observed only when  $\delta$  is close to 0.5. This is because deviations from this stoichiometry reduce the  $Co^{3+}$  concentration, thereby suppressing MIT, which is associated with the spin-state of  $Co^{3+}$  ions, consistent with the previous reports<sup>1</sup>. These observations demonstrate that both structural symmetry and the concentration of  $Co^{3+}$  ions are critical factors in stabilizing MIT in  $ReBaCo_2O_{5+\delta}$ .

1. A. A. Taskin, et al., Transport and magnetic properties of  $GdBaCo_2O_{5+x}$  single crystals: A cobalt oxide with square-lattice  $CoO_2$  planes over a wide range of electron and hole doping, *Phys. Rev. B*, 2005, **71**, 134414.
